# Supplementary material for: Dengue vaccine breakthrough infections reveal properties of neutralizing antibodies linked to protection
Source: JCI journal article supplement (doi:10.1172/jci147066), 2021-05-18
Supplement: sd1 [file 1]

1 **Supplementary Material**

2

3 **Methods**

4 **Virus Strains used in the study.** The DENV strains used for the neutralization assay,  
5 preparing antigens for depletions and ELISA binding assays are DENV1 WestPac-74,  
6 DENV2 S16803, DENV3 CH53489 and DENV4 TVP-376. The DENV envelopes in  
7 Dengvaxia were derived from DENV1 Thailand PUO-359, DENV2 Thailand PUO-218,  
8 DENV3 Thailand PaH881/88 and DENV4 Indonesia 1228.

9

10 **Serum Sample Collection** Dengvaxia phase III clinical trials in Asia (CYD14) and Latin  
11 America (CYD15) were previously described(1, 2). In brief, CYD14 was conducted in five  
12 countries in Asia where 2-14 years old healthy children were enrolled, while CYD15 was  
13 conducted in four countries in Latin America and Puerto Rico, enrolling 9-16 years old  
14 healthy children. Both studies were randomized 2:1 where participants received three  
15 doses of either the vaccine or placebo at months 0, 6 and 12 of the study. Sera was drawn  
16 in month 13 of clinical trial, one month after completion of three dose Dengvaxia regimen.  
17 Baseline blood samples were collected from approximately 10% of children before  
18 vaccination. The serostatus of these children before vaccination was determined by  
19 testing the baseline blood samples for DENV neutralizing antibodies. For the remaining  
20 children with no baseline blood samples, a DENV NS1 antibody test was used to  
21 determine serostatus. As Dengvaxia does not contain the DENV NS1 protein, any child  
22 with DENV NS1 antibodies at the termination of vaccination was designated as baseline  
23 DENV-seropositive. The development, validation and use of this assay to determine

24 serostatus has already been described (3). Supplementary Table 1 indicates how  
25 baseline serostatus was determined for the subjects analyzed for the current study.

26 The natural infection serum samples were collected from US residing healthy adults, who  
27 experienced a dengue infection while traveling to a dengue endemic country.

28

29 **Antibody Depletion** Depletion studies were performed as previously described.(4)

30 Dynabeads were covalently linked to anti-E MAb 1M7 for 18 hrs at 37°C. Complex was

31 subsequently blocked with 1% BSA in PBS solution at 37°C and washed with 0.1 M 2-(N-

32 morpholino) ethanesulfonic acid (MES) buffer. Beads were incubated with purified virus

33 serotypes separately. Virion/bead/MAb complex was then washed with PBS. DENV

34 specific antibodies were depleted from sera by incubating virus/bead complex with sera

35 diluted at 1:10 in PBS for 1 hr at 37°C with end over end mixing for three sequential

36 rounds of depletion. Removal of all antibodies binding to the depleting viral antigen was

37 confirmed by ELISA. All Ab depletion experiments to characterize NAb to a particular

38 serotype included the following experimental groups: A) a control depletion group (sera

39 incubated with beads containing no DENV antigen) to measure total level of NAb to the

40 serotype; B) a complete Ab depletion group (sera incubated with beads containing the

41 homologous DENV serotype) to measure loss of NAb following removal of all virus

42 binding (TS and CR) Abs; C) a CR Ab depletion group (sera incubated with beads

43 containing one or more heterologous DENV serotype) to measure levels of NAb after

44 removal of CR Ab only. DENV do not grow to very high titers in cell culture and purification

45 viral antigen for depletion is a laborious and expensive process. We did not have sufficient

46 viral antigen to consistently use all three heterologous serotypes for removing CR Ab.

47 The heterologous serotypes selected to deplete CR Abs for each study was based on the  
48 availability of purified viral antigens in the laboratory. As CR Abs bind to epitopes that  
49 are conserved across all 4 DENV serotypes, efficient depletion is likely to mainly depend  
50 on the quantity of heterologous DENV antigen used and not the number of heterologous  
51 serotypes. To directly evaluate the impact of using one versus three heterologous  
52 serotypes for removing CR Abs, we measured levels of DENV4 TS NAbs in 13 vaccinated  
53 subjects after removing CR Abs with DENV2 alone or a mix of DENV1, 2 and 3. Both  
54 approaches led to similar estimates of DENV4 TS NAbs in each subject (Supplementary  
55 Figure 5), validating the use of one or more than one heterologous serotype for removing  
56 CR Abs.

57

58 **Enzyme-Linked Immunosorbent Assay (ELISA)** To confirm successful depletion of a  
59 certain DENV specific population of Abs, IgG binding ELISA was conducted as previously  
60 described. (5) Purified DENV was either directly coated or captured using a DENV  
61 specific monoclonal Ab on a 96-well ELISA plate, the plate was then blocked using either  
62 3% Normal Goat Serum (NGS) or 3% Non-Fat Dry Milk (NFDM) respectively to eliminate  
63 any nonspecific binding. The depleted serum sample is then added at 1:20 dilution and  
64 incubated at 37°C for an hour, then washed off. Binding was evaluated by 1 hour  
65 incubation with secondary anti-human-alkaline phosphatase conjugated Ab (Sigma  
66 A9544) at 37°C, which is then washed off. *P*-nitrophenyl phosphate substrate is then  
67 added and the Optical Density (OD) is measured at 405nm. In a successful depletion of  
68 a dengue experienced serum sample, the OD in the control depleted sample should be  
69 high ( $\geq 1$ ) and the OD in the homologous depleted sample should be close to background

70 or Normal Human Serum (NHS) level. If that sample has Abs that are specific to a  
71 particular serotype, the OD in the heterologous depleted sample should be higher than  
72 the NHS and background level. Limit of detection was defined as average of normal  
73 human sera + 3x standard deviation.

74

75 **Focus Reduction Neutralization Test (FRNT)** The neutralization tests were conducted  
76 in 96-well format on Vero-81 cells (ATCC CCL-81).  $2 \times 10^4$  cells were seeded overnight.  
77 On the day of the assay, virus stocks were diluted in dilution media (Dulbecco modified  
78 Eagle medium (DMEM) with 2% Fetal Bovine Serum (FBS)) to achieve 60-80 foci/well in  
79 the virus + cells only wells. Separately the serum samples to be tested were serially  
80 diluted three folds starting at 1:10 in the same dilution media. The diluted virus is then  
81 added to the serum in a 1:1 ratio making the final starting dilution of serum at 1:20 and  
82 the complex is then incubated at 37°C for 1 hour before being added to the cells and  
83 incubated for another hour at 37°C. The cells were then washed with the dilution media  
84 and Opti-MEM (Gibco) supplemented with 2% FBS, 1% Anti-Anti (Gibco) and 1%  
85 Carboxymethylcellulose is added and cells are incubated at 37°C for 45-52 hours before  
86 fixing using 4% PFA. The reported  $EC_{50}$  values were calculated using variable slope-  
87 sigmoidal dose response equation using GraphPad Prism 8. All reported results were  
88 subjected to our quality control parameters of  $R^2 \geq 0.75$ , a hill slope of  $|\geq 5|$  and the  
89 calculated  $EC_{50}$  value should be within the range of the assay. All values that did not meet  
90 these standards were assigned the baseline value.

91

92 **Supplementary Tables**

93

94

| Supplementary Table 1. Wild type DENV1 and DENV3 infection specimens |                      |                 |                   |                 |                                                          |
|----------------------------------------------------------------------|----------------------|-----------------|-------------------|-----------------|----------------------------------------------------------|
| Sample                                                               | Country of Infection | Infecting Virus | Year of Infection | Collection Year | Interval between infection and sample collection (Years) |
| WT DV1-1                                                             | India                | DENV1           | 2007              | 2009            | 2                                                        |
| WT DV1-2                                                             | Ecuador              |                 | 2006              | 2014            | 8                                                        |
| WT DV1-3                                                             | Bolivia              |                 | 2012              | 2014            | 2                                                        |
| WT DV1-4                                                             | India                |                 | 1991              | 2015            | 24                                                       |
| WT DV1-5                                                             | Unknown              |                 | Unknown           | Unknown         | Unknown                                                  |
| WT DV1-6                                                             | Unknown              |                 | Unknown           | Unknown         | Unknown                                                  |
| WT DV1-7                                                             | Virgin Islands       |                 | 1982-1995         | 2005            | 13                                                       |
| WT DV1-8                                                             | Brazil               |                 | 1998              | 2005            | 7                                                        |
| WT DV1-9                                                             | Dominican Republic   |                 | 2004              | 2005            | 1                                                        |
| WT DV1-10                                                            | Guyana               |                 | 2010              | 2014            | 4                                                        |
| WT DV1-11                                                            | Malaysia             |                 | 2008              | 2016            | 8                                                        |
| WT DV3-1                                                             | Unknown              | DENV3           | Unknown           | Unknown         | Unknown                                                  |
| WT DV3-2                                                             | Unknown              |                 | Unknown           | Unknown         | Unknown                                                  |
| WT DV3-3                                                             | Nicaragua            |                 | 1995              | 2009            | 14                                                       |
| WT DV3-4                                                             | Thailand             |                 | 2002              | 2009            | 7                                                        |
| WT DV3-5                                                             | Sri Lanka            |                 | 2008              | 2009            | 1                                                        |
| WT DV3-6                                                             | Nicaragua            |                 | 2009              | 2010            | 1                                                        |
| WT DV3-7                                                             | Sri Lanka            |                 | 2011              | 2012            | 1                                                        |
| WT DV3-8                                                             | Nicaragua            |                 | 1998              | 2016            | 18                                                       |

95

96

**Supplementary Table 2. Dengvaxia Breakthrough Infection Specimens**

| Sample ID | Country of Origin | Assay to determine DENV serostatus before vaccination | Days between vaccination and DENV infection | Infecting DENV serotype |
|-----------|-------------------|-------------------------------------------------------|---------------------------------------------|-------------------------|
| DV1-1     | Colombia          | NS1 Ab ELISA                                          | 157                                         | DENV1                   |
| DV1-2     | Colombia          | NS1 Ab ELISA                                          | 112                                         |                         |
| DV1-3     | Philippines       | NS1 Ab ELISA                                          | 1108                                        |                         |
| DV1-4     | Philippines       | NS1 Ab ELISA                                          | 130                                         |                         |
| DV1-5     | Philippines       | NS1 Ab ELISA                                          | 308                                         |                         |
| DV1-6     | Philippines       | NS1 Ab ELISA                                          | 336                                         |                         |
| DV1-7     | Thailand          | Neutralization test                                   | 972                                         |                         |
| DV1-8     | Thailand          | NS1 Ab ELISA                                          | 994                                         |                         |
| DV1-9     | Mexico            | NS1 Ab ELISA                                          | 46                                          |                         |
| DV1-10    | Mexico            | NS1 Ab ELISA                                          | 714                                         |                         |
| DV1-11    | Mexico            | NS1 Ab ELISA                                          | 263                                         |                         |
| DV1-12    | Mexico            | NS1 Ab ELISA                                          | 243                                         |                         |
| DV1-13    | Vietnam           | NS1 Ab ELISA                                          | 502                                         |                         |
| DV1-14    | Vietnam           | NS1 Ab ELISA                                          | 264                                         |                         |
| DV1-15    | Vietnam           | NS1 Ab ELISA                                          | 1003                                        |                         |
| DV3-1     | Colombia          | NS1 Ab ELISA                                          | 213                                         | DENV3                   |
| DV3-2     | Colombia          | NS1 Ab ELISA                                          | 150                                         |                         |
| DV3-3     | Colombia          | NS1 Ab ELISA                                          | 74                                          |                         |
| DV3-4     | Colombia          | NS1 Ab ELISA                                          | 58                                          |                         |
| DV3-5     | Colombia          | NS1 Ab ELISA                                          | 339                                         |                         |
| DV3-6     | Colombia          | NS1 Ab ELISA                                          | 93                                          |                         |
| DV3-7     | Colombia          | NS1 Ab ELISA                                          | 155                                         |                         |
| DV3-8     | Colombia          | NS1 Ab ELISA                                          | 359                                         |                         |
| DV3-9     | Colombia          | NS1 Ab ELISA                                          | 662                                         |                         |
| DV3-10    | Colombia          | NS1 Ab ELISA                                          | 47                                          |                         |
| DV3-11    | Honduras          | NS1 Ab ELISA                                          | 411                                         |                         |
| DV3-12    | Honduras          | NS1 Ab ELISA                                          | 337                                         |                         |
| DV3-13    | Honduras          | NS1 Ab ELISA                                          | 359                                         |                         |
| DV3-14    | Philippines       | NS1 Ab ELISA                                          | 1103                                        |                         |
| DV3-15    | Thailand          | NS1 Ab ELISA                                          | 316                                         |                         |
| DV3-16    | Thailand          | NS1 Ab ELISA                                          | 960                                         |                         |
| DV3-17    | Thailand          | Neutralization test                                   | 1047                                        |                         |
| DV3-18    | Vietnam           | Neutralization test                                   | 398                                         |                         |

**Supplementary Table 3. Percentage of DENV serotype specific antibodies in Dengvaxia recipients**

| Subject | Breakthrough Infection | Dep Strategy      | % DV1 TS-Ab | % DV3 TS-Ab | % DV4 TS-Ab |
|---------|------------------------|-------------------|-------------|-------------|-------------|
| C-1     | None                   | BSA, DV1/2, DV3/4 | 0           | <b>25</b>   | 0           |
| C-2     |                        | BSA, DV1/2, DV3/4 | 0           | 0           | <b>35</b>   |
| C-3     |                        | BSA, DV1/2, DV3/4 | 0           | 0           | 0           |
| C-4     |                        | BSA, DV1/2, DV3/4 | 0           | 0           | <b>46</b>   |
| C-5     |                        | BSA, DV1/2, DV3/4 | 0           | 0           | 0           |
| C-6     |                        | BSA, DV1/2, DV3/4 | 0           | 0           | <b>37</b>   |
| C-7     |                        | BSA, DV1/2, DV3/4 | 0           | 0           | <b>51</b>   |
| C-8     |                        | BSA, DV1/2, DV3/4 | 0           | <b>17</b>   | 0           |
| C-9     |                        | BSA, DV1/2, DV3/4 | <b>14</b>   | 0           | <b>48</b>   |
| C-10    |                        | BSA, DV1/2, DV3/4 | 0           | <b>52</b>   | 0           |
| C-11    |                        | BSA, DV1/2, DV3/4 | <b>81</b>   | 0           | 0           |
| DV3-1   | DENV3                  | BSA, DV3, DV1/2/4 | <b>34</b>   | <b>61</b>   | <b>35</b>   |
| DV3-2   |                        | BSA, DV3, DV1/2/4 | <b>44</b>   | 0           | <b>11</b>   |
| DV3-3   |                        | BSA, DV3, DV1/2/4 | 0           | 0           | <b>42</b>   |
| DV3-4   |                        | BSA, DV3, DV1/2/4 | <b>10</b>   | 0           | 0           |
| DV3-5   |                        | BSA, DV3, DV1/2/4 | 0           | 0           | <b>100</b>  |
| DV3-6   |                        | BSA, DV3, DV1/2/4 | 0           | 0           | <b>56</b>   |
| DV3-7   |                        | BSA, DV3, DV1/2/4 | 0           | 0           | <b>30</b>   |
| DV3-8   |                        | BSA, DV3, DV1/2/4 | <b>16</b>   | <b>42</b>   | <b>23</b>   |
| DV3-9   |                        | BSA, DV3, DV1/2/4 | 0           | 0           | <b>64</b>   |
| DV3-10  |                        | BSA, DV3, DV1/2/4 | 0           | 0           | <b>30</b>   |
| DV3-11  |                        | BSA, DV3, DV1/2/4 | 0           | 0           | 0           |
| DV3-12  |                        | BSA, DV3, DV1/2/4 | 0           | 0           | <b>15</b>   |
| DV3-13  |                        | BSA, DV3, DV1/2/4 | 0           | <b>35</b>   | <b>20</b>   |
| DV3-14  |                        | BSA, DV3, DV1/2/4 | 0           | 0           | <b>56</b>   |
| DV3-15  |                        | BSA, DV3, DV1/2/4 | <b>20</b>   | 0           | <b>22</b>   |
| DV3-16  |                        | BSA, DV3, DV1/2/4 | 0           | 0           | 0           |
| DV3-17  |                        | BSA, DV3, DV1/2/4 | <b>49</b>   | 0           | 0           |
| DV3-18  |                        | BSA, DV3, DV1/2/4 | 0           | <b>33</b>   | <b>22</b>   |
| DV1-1   | DENV1                  | BSA, DV1, DV2/4   | 0           | NT          | 0           |
| DV1-2   |                        | BSA, DV1, DV2/4   | 0           | NT          | 0           |
| DV1-3   |                        | BSA, DV1, DV2/4   | 0           | NT          | 0           |
| DV1-4   |                        | BSA, DV1, DV2/4   | 0           | NT          | <b>38</b>   |
| DV1-5   |                        | BSA, DV1, DV2/4   | 0           | NT          | 0           |
| DV1-6   |                        | BSA, DV1, DV2/4   | 0           | NT          | <b>100</b>  |
| DV1-7   |                        | BSA, DV1, DV2/4   | 0           | NT          | <b>22</b>   |
| DV1-8   |                        | BSA, DV1, DV2/4   | <b>29</b>   | NT          | <b>15</b>   |
| DV1-9   |                        | BSA, DV1, DV2/4   | 0           | NT          | 0           |
| DV1-10  |                        | BSA, DV1, DV2/4   | 0           | NT          | <b>22</b>   |
| DV1-11  |                        | BSA, DV1, DV2/4   | 0           | NT          | <b>71</b>   |
| DV1-12  |                        | BSA, DV1, DV2/4   | 0           | NT          | <b>55</b>   |
| DV1-13  |                        | BSA, DV1, DV2/4   | <b>29</b>   | NT          | <b>52</b>   |
| DV1-14  |                        | BSA, DV1, DV2/4   | <b>34</b>   | NT          | <b>100</b>  |
| DV1-15  |                        | BSA, DV1, DV2/4   | <b>42</b>   | NT          | 0           |

99 **Supplementary Figures**

100

101 **A) Primary DENV1 Natural Infection**

102

103

104

105

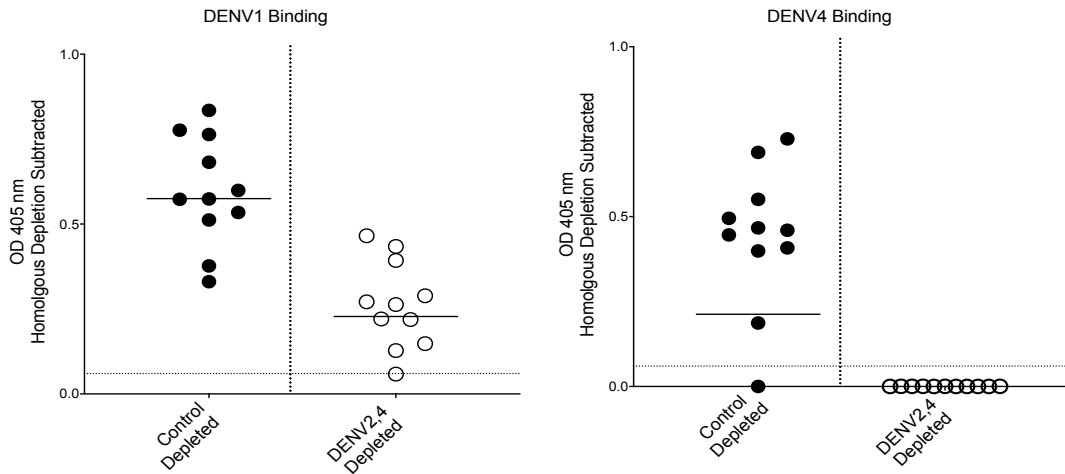

**B) Primary DENV3 Natural Infection**

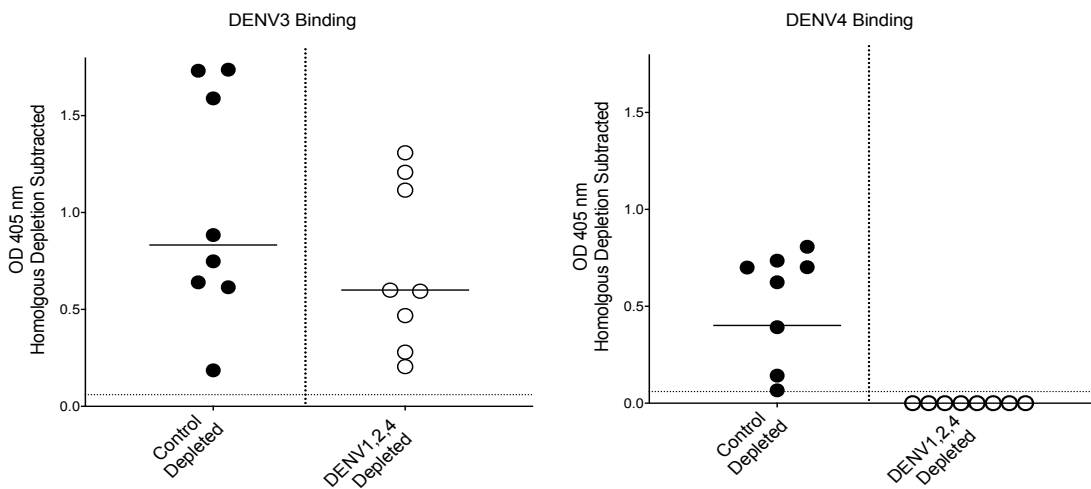

**Supplementary Figure 1: Depletion of DENV serotype cross-reactive antibodies in sera from people exposed to primary DENV1 or DENV3 infections.** Convalescent sera from people exposed to primary (A) DENV1 or (B) DENV3 infections were incubated with beads coated with heterologous DENV serotypes to remove serotype CR Abs. A mix of DENV 2 and 4 antigens were used to remove CR Abs in DENV1 immune sera and a mix of DENV1, 2, and 4 antigens was used to remove CR Abs in DENV3 immune sera. The depleted sera were tested by ELISA for Abs binding to a heterologous serotype (DENV4) to confirm removal of CR Abs and to the homologous serotype (DENV1 or DENV3) to estimate levels of TS binding Abs. Limit of detection (dashed dotted line) was defined as average of normal human sera + standard deviation multiplied by 3.



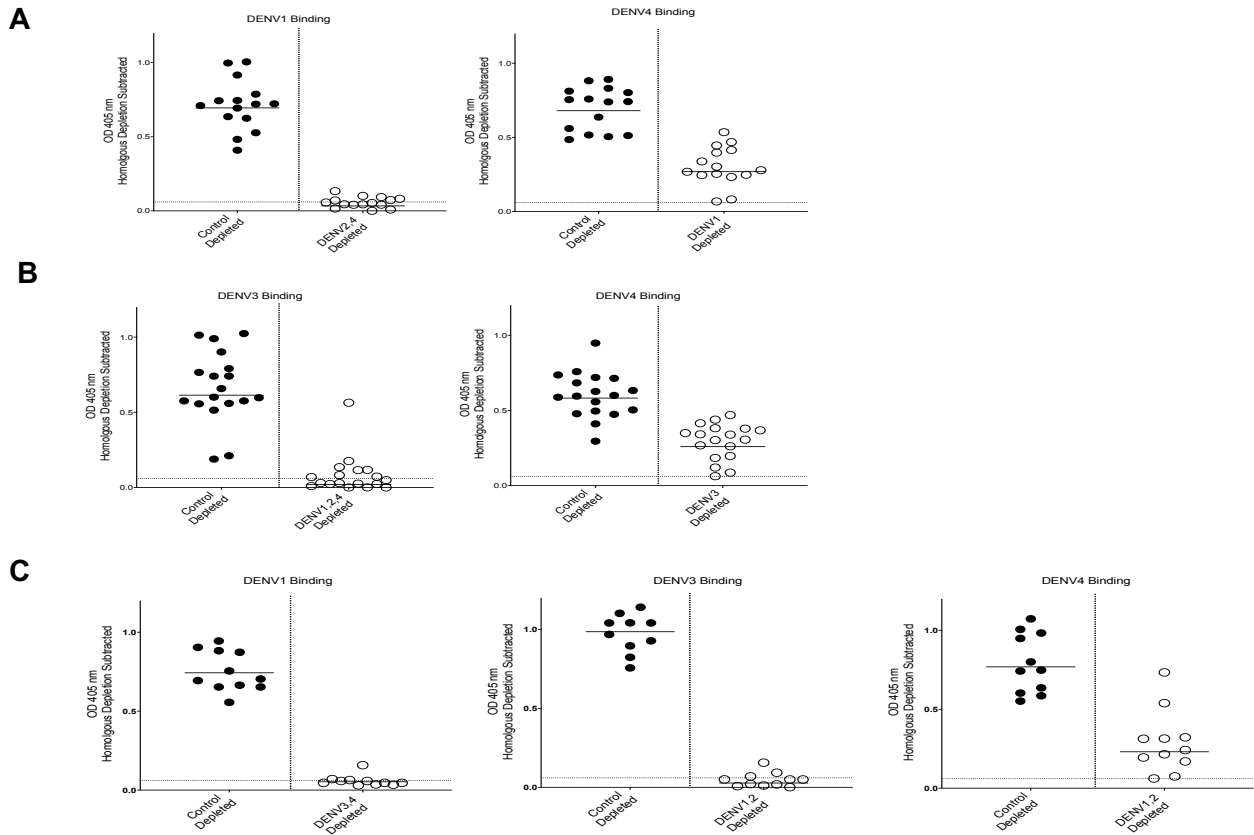

**Supplementary Figure 2: Depletion of DENV-specific antibody populations from immune sera collected from dengue naïve children who received Dengvaxia.**

Vaccine immune sera from children who subsequently experienced DENV1 breakthrough infections **(A)**, DENV3 breakthrough infections **(B)** or no DENV infections **(C)** were incubated with beads coated with different DENV serotypes to deplete specific Ab populations. The depleted sera were tested by ELISA to estimate levels of TS binding antibodies to DENV1, DENV3 and DENV4. Limit of detection (dashed dotted line) was defined as average of normal human sera + standard deviation multiplied by 3.

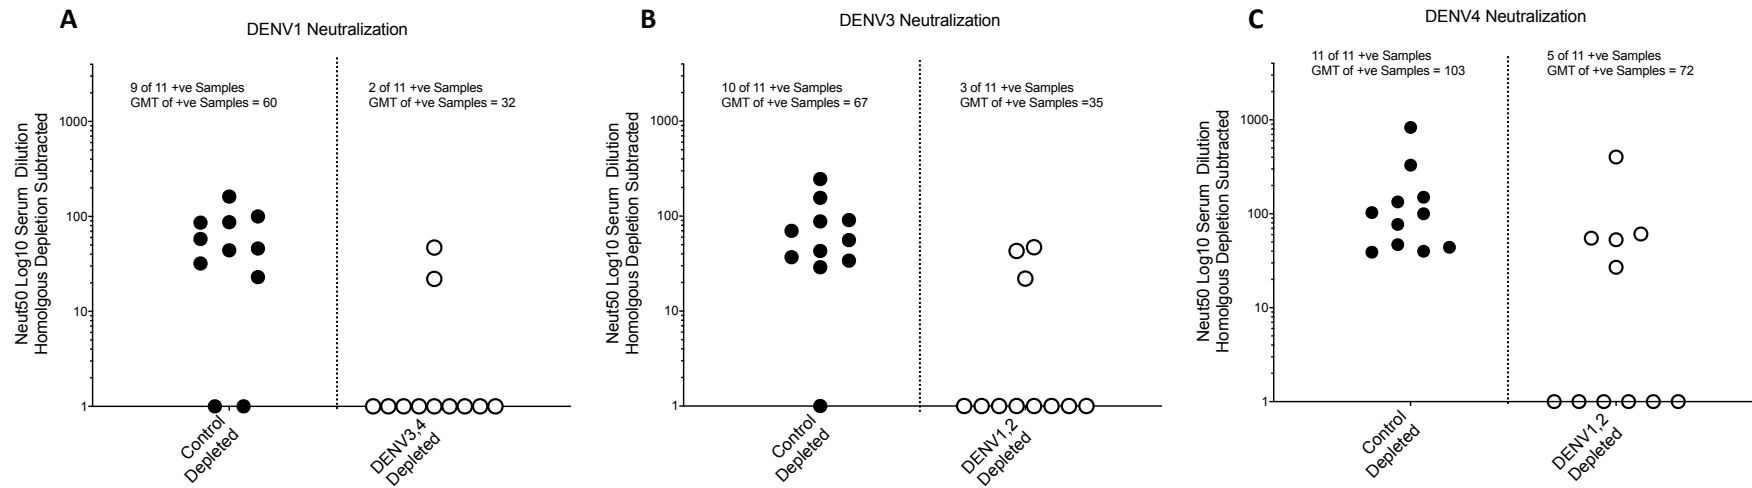

**Supplementary Figure 3: Vaccine induced neutralizing antibody responses in children with no documented DENV breakthrough infections.** Vaccine responses were analyzed in baseline seronegative children (n = 11) who received Dengvaxia and did not experience breakthrough infections during the clinical trial. The sera were tested to measure levels of total and TS NABs to DENV1 (A), DENV3 (B) and DENV4 (C).

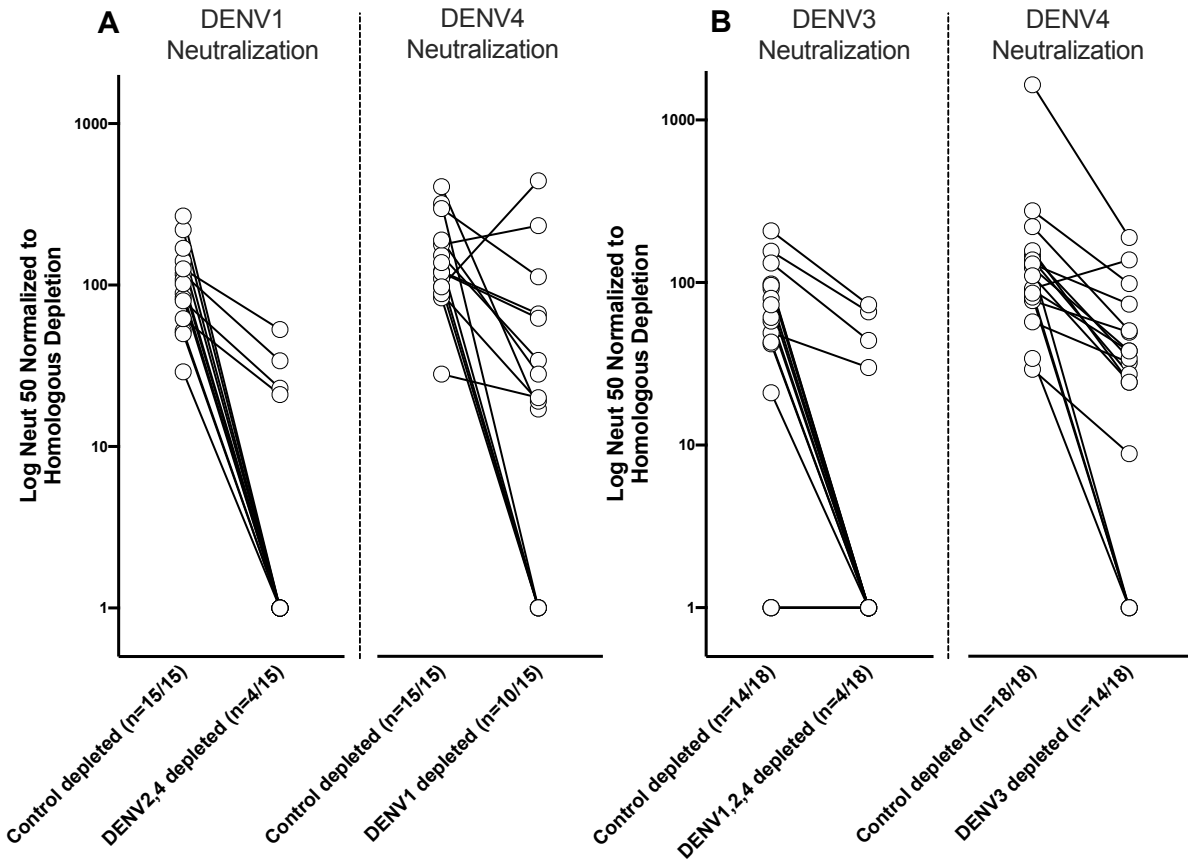

109

110 **Supplementary Figure 4. Individual subject level analysis of vaccine stimulated**  
 111 **total and DENV serotype-specific NAb responses in children who subsequently experienced**  
 112 **breakthrough infections.**

113 Vaccine responses were analyzed in children who received  
 114 Dengvaxia and subsequently experienced DENV1 (A) or DENV3 (B) breakthrough  
 115 infections. (A) In children who experienced DENV1 breakthrough infections (N=15),  
 116 DENV1 NAb responses after vaccination were measured without depleting any antibody  
 117 (Control Depleted) and after removal of CR Ab (DENV2,4 depleted). DENV4 NAb  
 118 responses after vaccination were measured without depleting any antibody (Control  
 119 Depleted) and after removal of CR Ab (DENV1 depleted). (B) In children who experienced  
 120 DENV3 breakthrough infections (N=18), DENV3 NAb responses after vaccination were  
 121 measured without depleting any antibody (Control Depleted) and after removal of CR Ab  
 122 (DENV1, 2, 4 depleted). DENV4 NAb responses after vaccination were measured without  
 123 depleting any antibody (Control Depleted) and after removal of CR Ab (DENV3 depleted).  
 n= x/x denotes number with neutralizing antibody over total number of subjects.

124

**DENV4 Neutralizing antibody levels after depletion of cross-reactive antibodies using one versus three heterologous DENV serotypes**

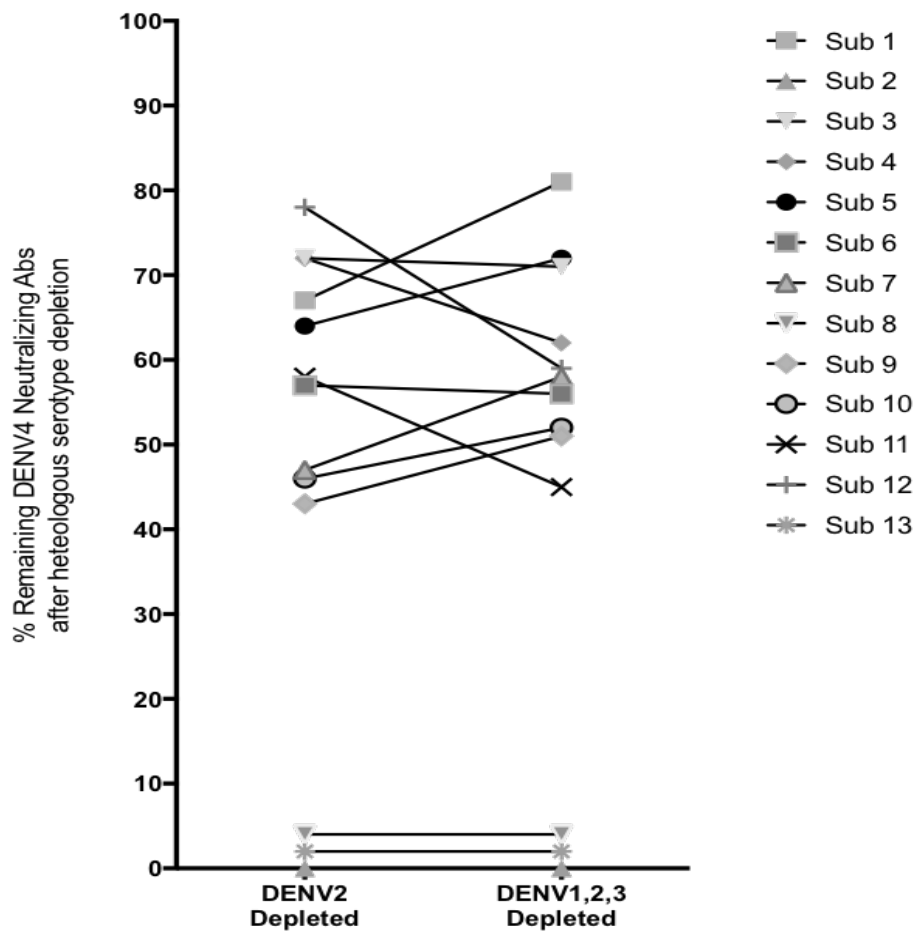

125

126

127 **Supplementary Figure 5: Impact of depleting vaccine induced antibodies using one**  
 128 **or three heterologous DENV serotypes on DENV4 neutralization.** Immune serum  
 129 was collected from 13 baseline seronegative subjects one month after receiving the final  
 130 dose of Dengvaxia (Clinical trial CYD 17). The sera were depleted of heterologous  
 131 antibodies (in relation to DENV4) using DENV2 alone or a mixture of DENV1,2 and 3  
 132 antigens. Control, and antibody depleted sera were tested for neutralization of DENV4.  
 133 Ten of the 13 subjects retained >40% of DENV4 neutralizing antibodies, confirming the  
 134 high frequency of DENV4 type-specific responses after vaccination. Removal of cross-  
 135 reactive antibodies using one or all three heterologous serotypes yielded similar  
 136 estimates for levels of DENV4 type-specific neutralizing antibodies in each subject.

137

138

139

140

141

- 142 1. Capeding MR, Tran NH, Hadinegoro SR, Ismail HI, Chotpitayasunondh T, Chua MN, et al. Clinical  
143 efficacy and safety of a novel tetravalent dengue vaccine in healthy children in Asia: a phase 3,  
144 randomised, observer-masked, placebo-controlled trial. *Lancet*. 2014;384(9951):1358-65.
- 145 2. Hadinegoro SR, Arredondo-Garcia JL, Capeding MR, Deseda C, Chotpitayasunondh T, Dietze R, et  
146 al. Efficacy and Long-Term Safety of a Dengue Vaccine in Regions of Endemic Disease. *N Engl J*  
147 *Med*. 2015;373(13):1195-206.
- 148 3. Sridhar S, Luedtke A, Langevin E, Zhu M, Bonaparte M, Machabert T, et al. Effect of Dengue  
149 Serostatus on Dengue Vaccine Safety and Efficacy. *N Engl J Med*. 2018;379(4):327-40.
- 150 4. Gallichotte EN, Baric TJ, Nivarthi U, Delacruz MJ, Graham R, Widman DG, et al. Genetic Variation  
151 between Dengue Virus Type 4 Strains Impacts Human Antibody Binding and Neutralization. *Cell*  
152 *Rep*. 2018;25(5):1214-24.
- 153 5. de Alwis R, Beltramello M, Messer WB, Sukupolvi-Petty S, Wahala WM, Kraus A, et al. In-depth  
154 analysis of the antibody response of individuals exposed to primary dengue virus infection. *PLoS*  
155 *Negl Trop Dis*. 2011;5(6):e1188.

156
